# Supplementary material for: Asymmetric and symmetric PCR of gold nanoparticles: A pathway to scaled-up self-assembly with tunable chirality
Source: Royal Society of Chemistry journal article supplement (doi:10.1039/c2jm15800k), 2012-01-01
Supplement: c2jm15800k.pdf [file c2jm15800k.pdf]

## Supporting Information

### Asymmetric and Symmetric PCR of Gold Nanoparticles: A Pathway to Scaled-Up Self-Assembly with Tunable Chirality

Yuan Zhao<sup>1</sup>, Liguang Xu<sup>1</sup>, Hua Kuang<sup>1</sup>, Libing Wang<sup>1,2\*</sup>, Chuanlai Xu<sup>1\*</sup>

<sup>1</sup>*School of Food Science & Technology, State Key Lab of Food Science & Technology, Jiangnan University,  
Wuxi 214122, China*

<sup>2</sup>*Technological Centre of Hunan Entry-Exit Inspection and Quarantine Bureau, Changsha, 410001, China*

#### Captions:

**Table S1.** The nucleotide sequences of template and the primers.

**Fig. S1** TEM images of gold nanoparticles with the diameter at 25±3 nm (A) and 10±2 nm (B).

**Fig. S2** The electrophoresis results of the GNPs-primer conjugation.

**Fig. S3** The electrophoresis results of assembled structures by PCR at 40 cycles.

**Fig. S4** CD spectra of the control groups including small and big GNPs, dsDNA and the mixtures.

**Fig. S5** UV-vis spectra of superstructures in asymmetric PCR at different cycles (150 bp).

---

\* Corresponding author Tel: +86-510-85329076; fax: +86-510-85329076; E-mail: [wanglb@hnciq.gov.cn](mailto:wanglb@hnciq.gov.cn), [xcl@jiangnan.edu.cn](mailto:xcl@jiangnan.edu.cn)

1

2

3

**Table S1.** The nucleotide sequences of template and the primers.

| Name             | Nucleotide sequences (5' to 3') |
|------------------|---------------------------------|
| Template         | Plasmid $\lambda$ DNA           |
| F-primer (100bp) | -SH-ATGAAACGGCAGGCAGAACAGG      |
| R-primer (100bp) | -SH-ACAGGGACATCGCCACCAGAAA      |
| F-primer (152bp) | -SH-GGAGGGCGTAACCGACAA          |
| R-primer (152bp) | -SH-CCGCAGCAAACCTCACCATT        |

4

5

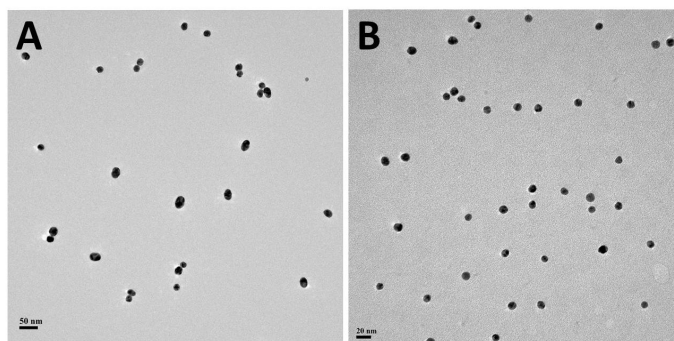

6

7 **Fig. S1** TEM images of gold nanoparticles with the diameter at  $25 \pm 3$  nm (A) and  $10 \pm 2$  nm

8 (B). The bar in A) was 50nm and in B) was 20nm.

9

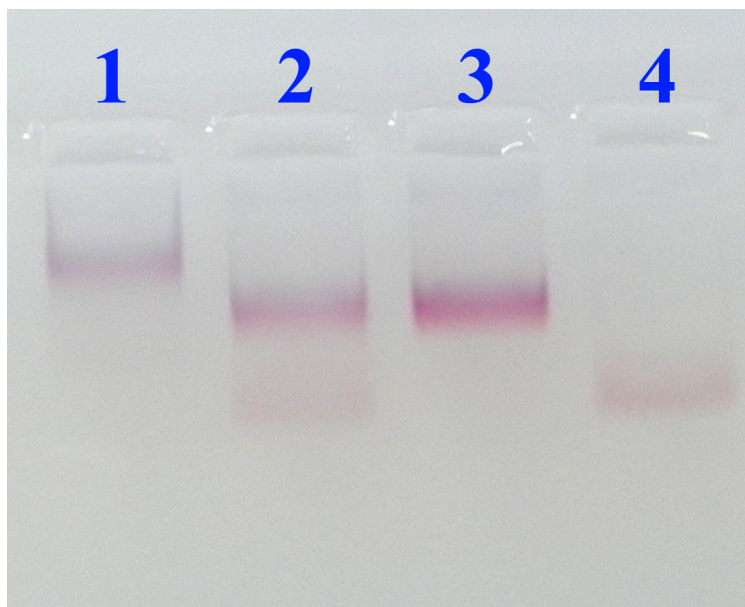

1

2

**Fig. S2** The electrophoresis results of the GNPs-primer conjugation.

3

Lane 1: PCR products; lane 2: mixture of big GNPs-primers and small GNPs-primers; lane 3:

4

big GNPs-primer conjugates; lane 4: small GNPs-primer conjugates.

5

From Figure S2, the bright-field image of the gel shows the mobility of GNPs in different

6

states. Lane 1 is the result of PCR product, which is composed of many big and small GNPs

7

in the structures. Therefore, the mobility is the slowest. As to the short sequence of the

8

forward and backward primers conjugated to the small and big GNPs, therefore, the mobility

9

of the GNPs-primer conjugates is a little faster.

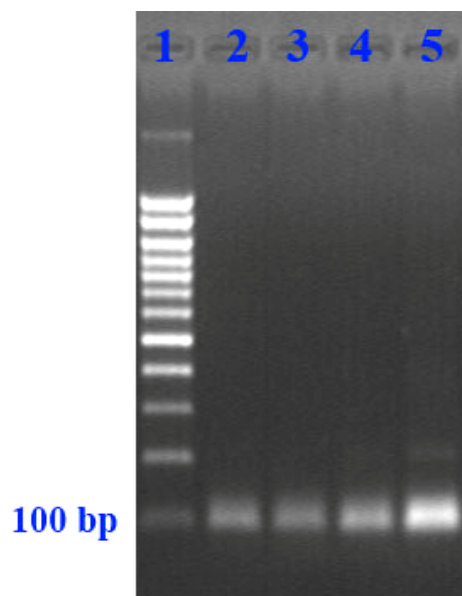

1

2

**Fig. S3** The electrophoresis results of assembled structures by PCR at 40 cycles.

3

Lane 1: standard marker; lane 2 and 3, the 1 fold PCR products; lane 4: 5-fold concentrated

4

PCR products; lane 5: 10-fold concentrated PCR products. Firstly, from the dark field image

5

of the gel, it is definitely confirmed that the PCR is carried out successfully.

6

7

8

9

10

11

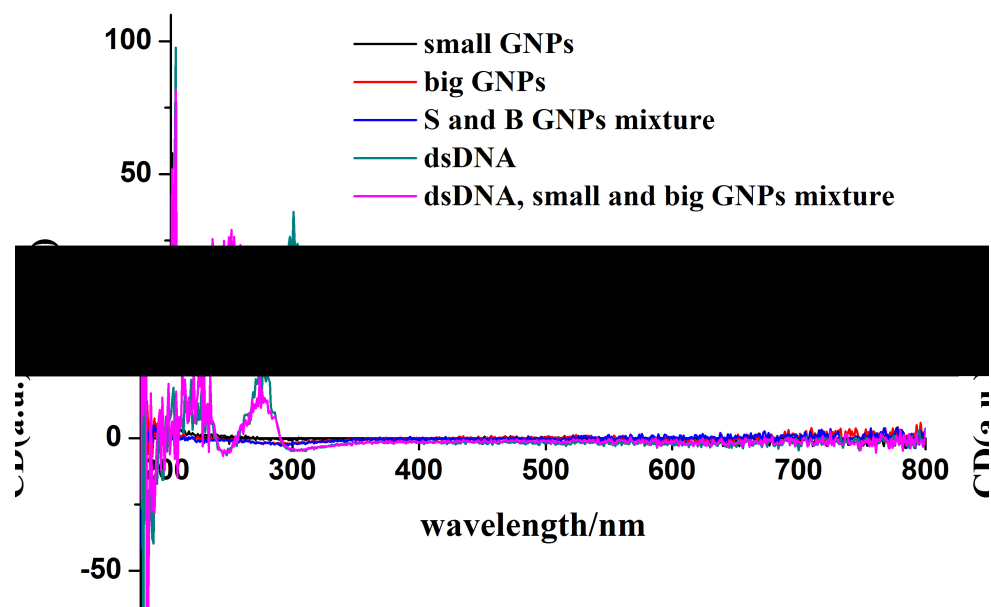

1

2

3 **Fig. S4** CD spectra of the control groups including small and big GNPs, dsDNA and the

4 mixtures.

5

6

7

8

9

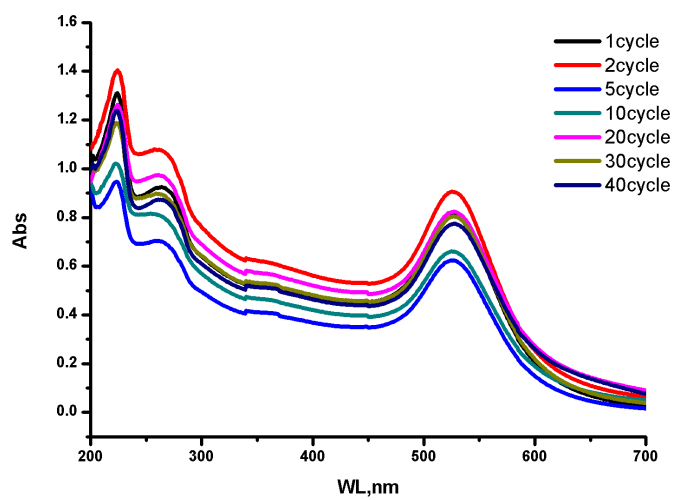

1

2 **Fig. S5** UV-vis spectra of superstructures in asymmetric PCR at different cycles (150 bp).

3
